# Supplementary material
Source: ML conference proceedings conference paper supplement (https://proceedings.mlr.press/v164/bhardwaj22a.html)
Supplement: Supplementary file 1 [file bhardwaj22a-supp.zip]

Archive with 2 entries (1 files):
- corl2021_supplementary/
- corl2021_supplementary/supplementary.pdf
